# Supplementary material for: Safety and function of a new pre-vascularized bioartificial pancreas in an allogeneic rat model
Source: PubMed Central journal article supplement — J Tissue Eng. 2020 May 27;11:2041731420924818. doi: 10.1177/2041731420924818 (PMC7257875; doi:10.1177/2041731420924818), 2020-05-27
Supplement: SUPPLEMENTARY_MATERIAL.pdf [file SUPPLEMENTARY_MATERIAL.pdf]

**SUPPLEMENTARY MATERIAL**

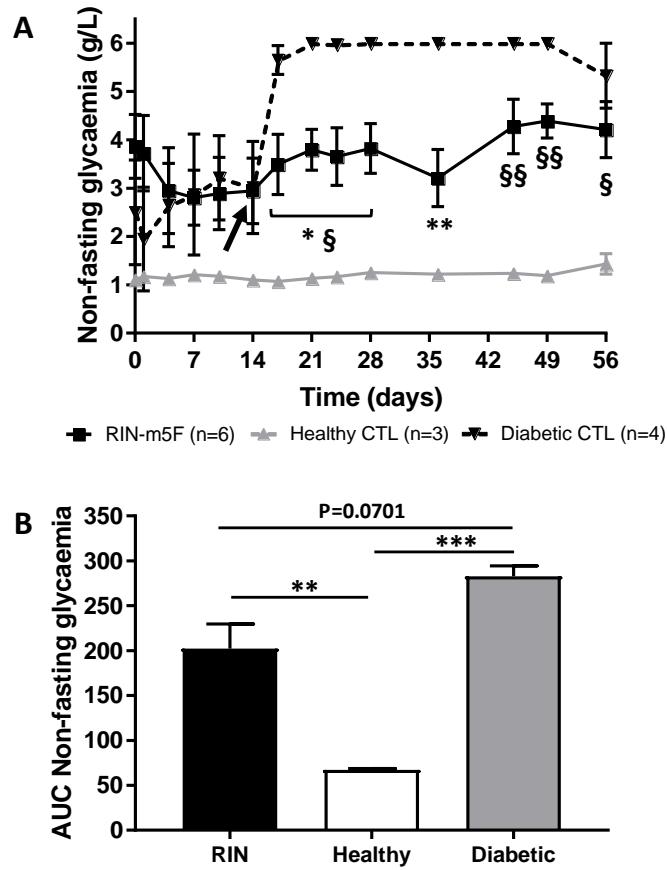

**SI-1.** Injection of RIN-m5F cells in MailPan<sup>®</sup> implanted in diabetic rats with partially normalized glycemia. (A) Non-fasting glycemia of rats that received RIN-m5F cells in MailPan<sup>®</sup> (RIN group n=6), healthy controls (n=3) and diabetic controls (n=4). Mean±SEM. \* and \*\* p<0.05 and 0.01 vs. diabetic controls, § and §§ p<0.05 and 0.01 vs. healthy controls two-way ANOVA. Black arrow indicates the time when exogenous insulin therapy was stopped. (B) AUC calculated from glycemia curves. Mean±SEM. \*\* and \*\*\* p<0.01 and 0.001.

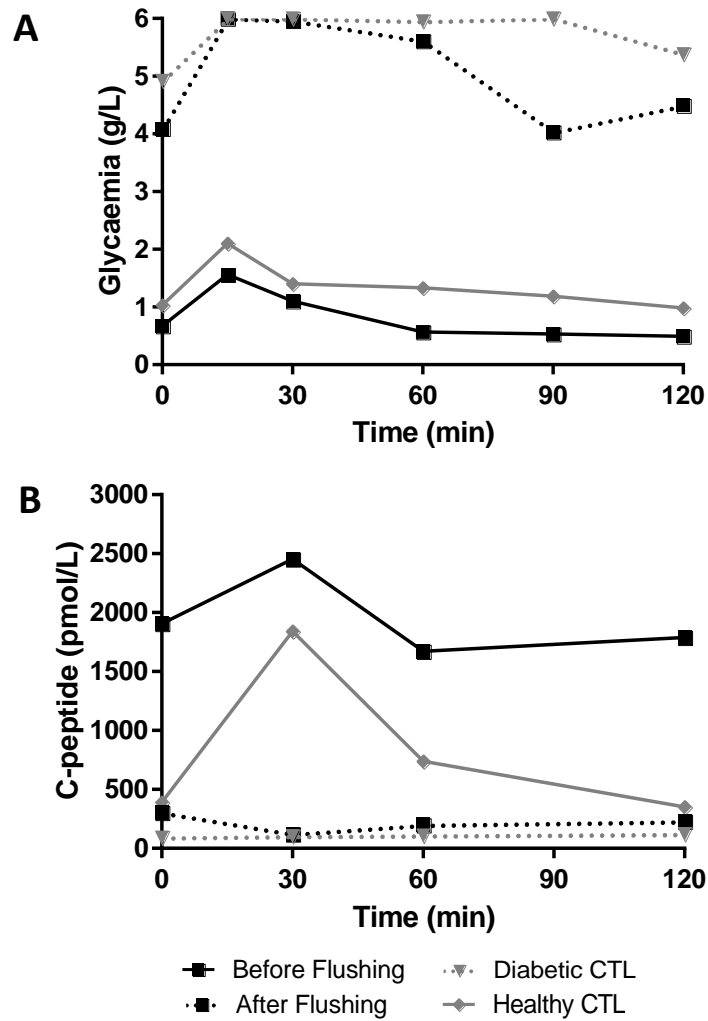

**SI-2.** Flushing out cells from the device impairs glucose tolerance and dramatically decrease C-peptide level. Glycaemia follow up (A), and C-peptide level (B) after OGTT performed on one rat with RIN-m5F cells into the MailPan<sup>®</sup> before and after flushing out the cells from the device.

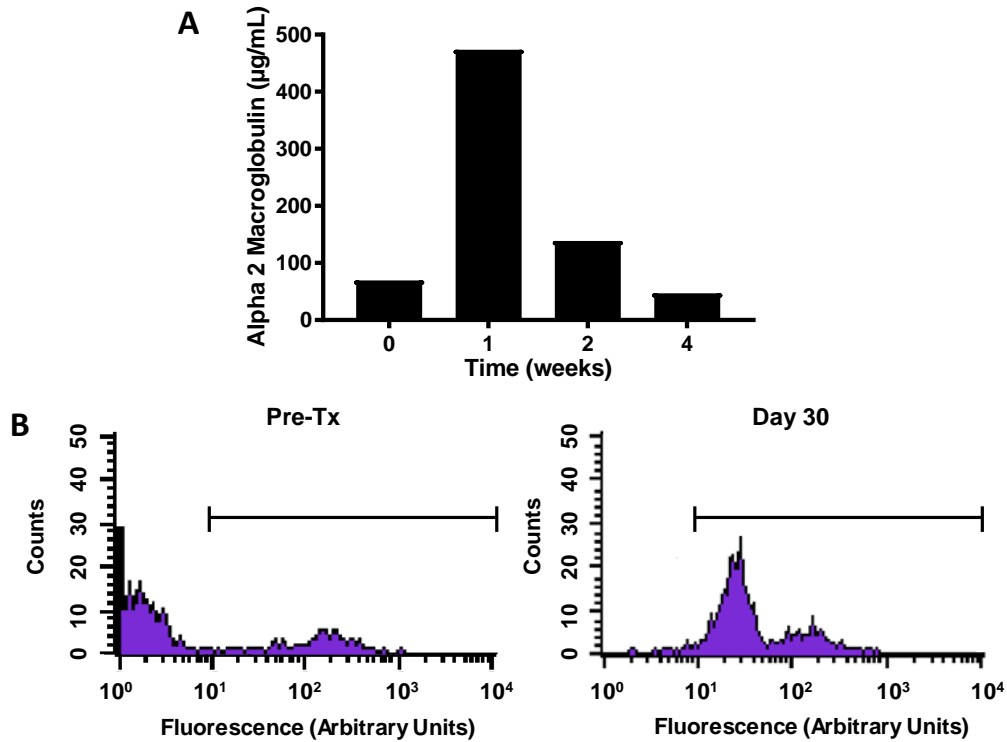

**SI-3.** A hole in MailPan<sup>®</sup> device results in immunization of one recipient against allogeneic islets. (A) Plasma levels of  $\alpha$ 2-Macroglobulin in one non-diabetic rat, after injection of 5000 allogeneic IEQ (T=0). MailPan<sup>®</sup> device of this rat was pierced with a needle during the implantation procedure. (B) Presence of anti-Dark Agouti antibodies in serum the Lewis recipient with damaged device assessed by flow cytometry, before and 30 days after injection of 5000 IEQ from Dark Agouti in MailPan<sup>®</sup>.

**Movies S1.** Live imaging of microcirculation around MailPan<sup>®</sup> clearly shows blood flow. Imaging performed after 6 months of implantation, using orthogonal spectral imaging spectroscopy (Microscan<sup>®</sup>).
